# Supplementary material for: Growth of crystallized titania from the cores of amorphous tetrabutyl titanate@PVDF nanowires
Source: Royal Society of Chemistry journal article supplement (doi:10.1039/c2jm33691j), 2012-01-01
Supplement: c2jm33691j.pdf [file c2jm33691j.pdf]

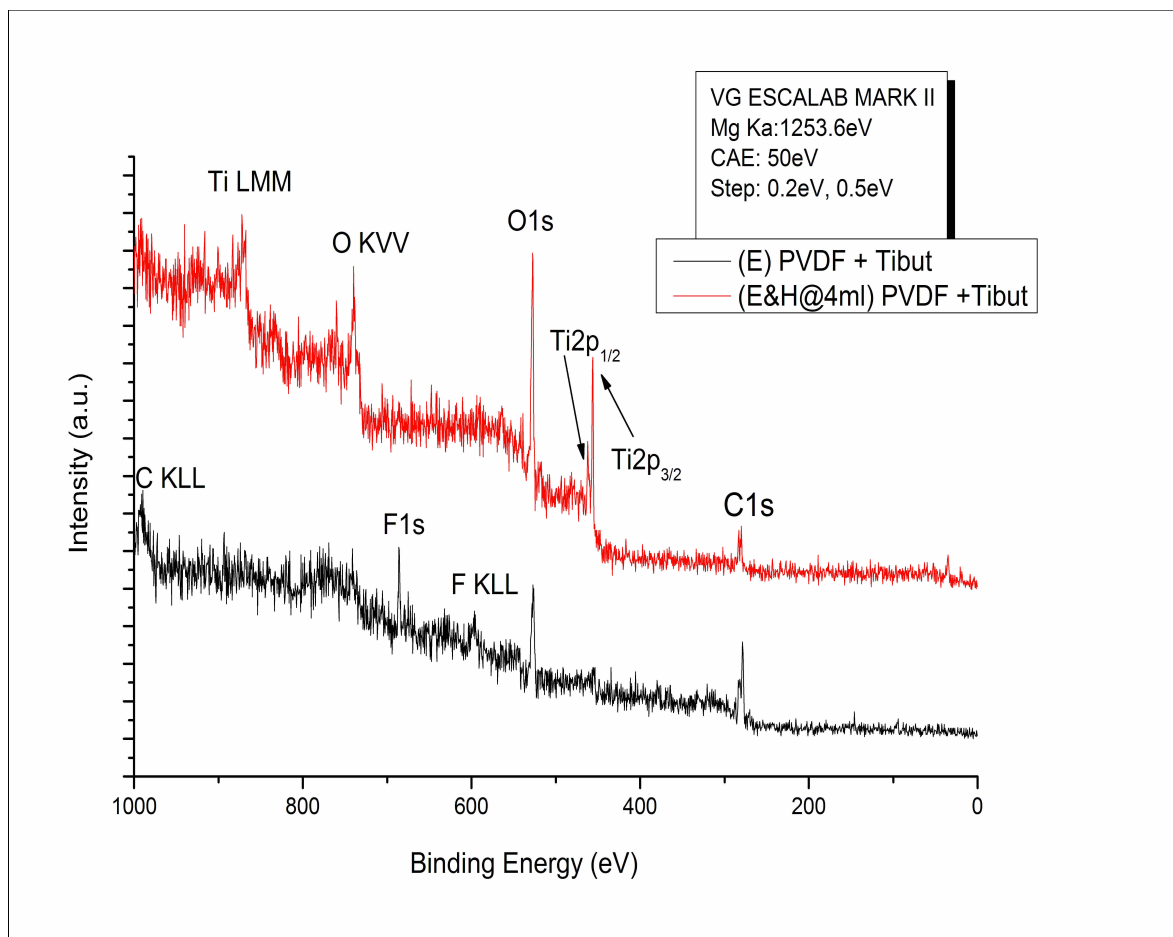

Figure: XPS spectra of (a) amorphous Ti at the electrospun PVDF nanowires core (black), crystallized TiO<sub>2</sub> on PVDF nanofibers after hydrothermally treated with 4ml (red)
